# Supplementary material for: Potential impact of outpatient stewardship interventions on antibiotic exposures of common bacterial pathogens
Source: eLife journal article supplement (doi:10.7554/elife.52307), 2020-02-05
Supplement: supp [file elife-52307-supp-v1.zip]

Archive with 7 entries (7 files):
- elife_poa_e52307_Figure_1_source_data_3.docx
- elife_poa_e52307_Figure_1_figure_supplement_2.docx
- elife_poa_e52307_Figure_1_source_data_2.docx
- elife_poa_e52307_Figure_1_figure_supplement_1.docx
- elife_poa_e52307_Figure_1_source_data_1.docx
- elife_poa_e52307_Transparent_Reporting_File.pdf
- elife_poa_e52307_Figure_1_figure_supplement_3.docx
