# Supplementary material for: Potential impact of outpatient stewardship interventions on antibiotic exposures of common bacterial pathogens
Source: eLife journal article supplement (doi:10.7554/elife.52307), 2020-02-05
Supplement: supp [file elife-52307-supp-v1.zip › elife_poa_e52307_Figure_1_figure_supplement_1.docx]

**Figure 1 – Figure Supplement 1.** Sensitivity analysis of proportions of avertable exposures across all outpatient conditions when proportion of unnecessary use is applied equally across target and bystander exposures (Equation 1 without modification).

**Abbreviations:** *Antibiotics (y-axis):* AMX-CLAV=amoxicillin-clavulanate, MACR/LINC=macrolides/ lincosamides, TMP-SMX=sulfamethoxazole-trimethoprim; *Organisms (x-axis):* EC=*E. coli*, HI=*H. influenzae*, KP=*K. pneumoniae*, MC=*M. catarrhalis*, PA=*P. aeruginosa*, SA=*S. aureus*, SAg=*S. agalactiae*, SP=*S. pneumoniae*, SPy=*S. pyogenes*; PY=person-years
