# Supplementary material for: Potential impact of outpatient stewardship interventions on antibiotic exposures of common bacterial pathogens
Source: eLife journal article supplement (doi:10.7554/elife.52307), 2020-02-05
Supplement: supp [file elife-52307-supp-v1.zip › elife_poa_e52307_Figure_1_figure_supplement_2.docx]

**Figure 1 – Figure Supplement 2.** Sensitivity analyses for Scenario 3 (elimination of all antibiotic use for acute sinusitis).

**A. Use estimates of unnecessary prescribing for acute sinusitis from Fleming-Dutra et al.** Based on Fleming-Dutra et al. (Fleming-Dutra et al., 2016), we estimate that the proportion of unnecessary antibiotic prescriptions for acute sinusitis is 18%, 100%, and 34% for individuals who are 0-19, 20-64, and over 65 years old, respectively (see Figure 1 – Source Data File 2).


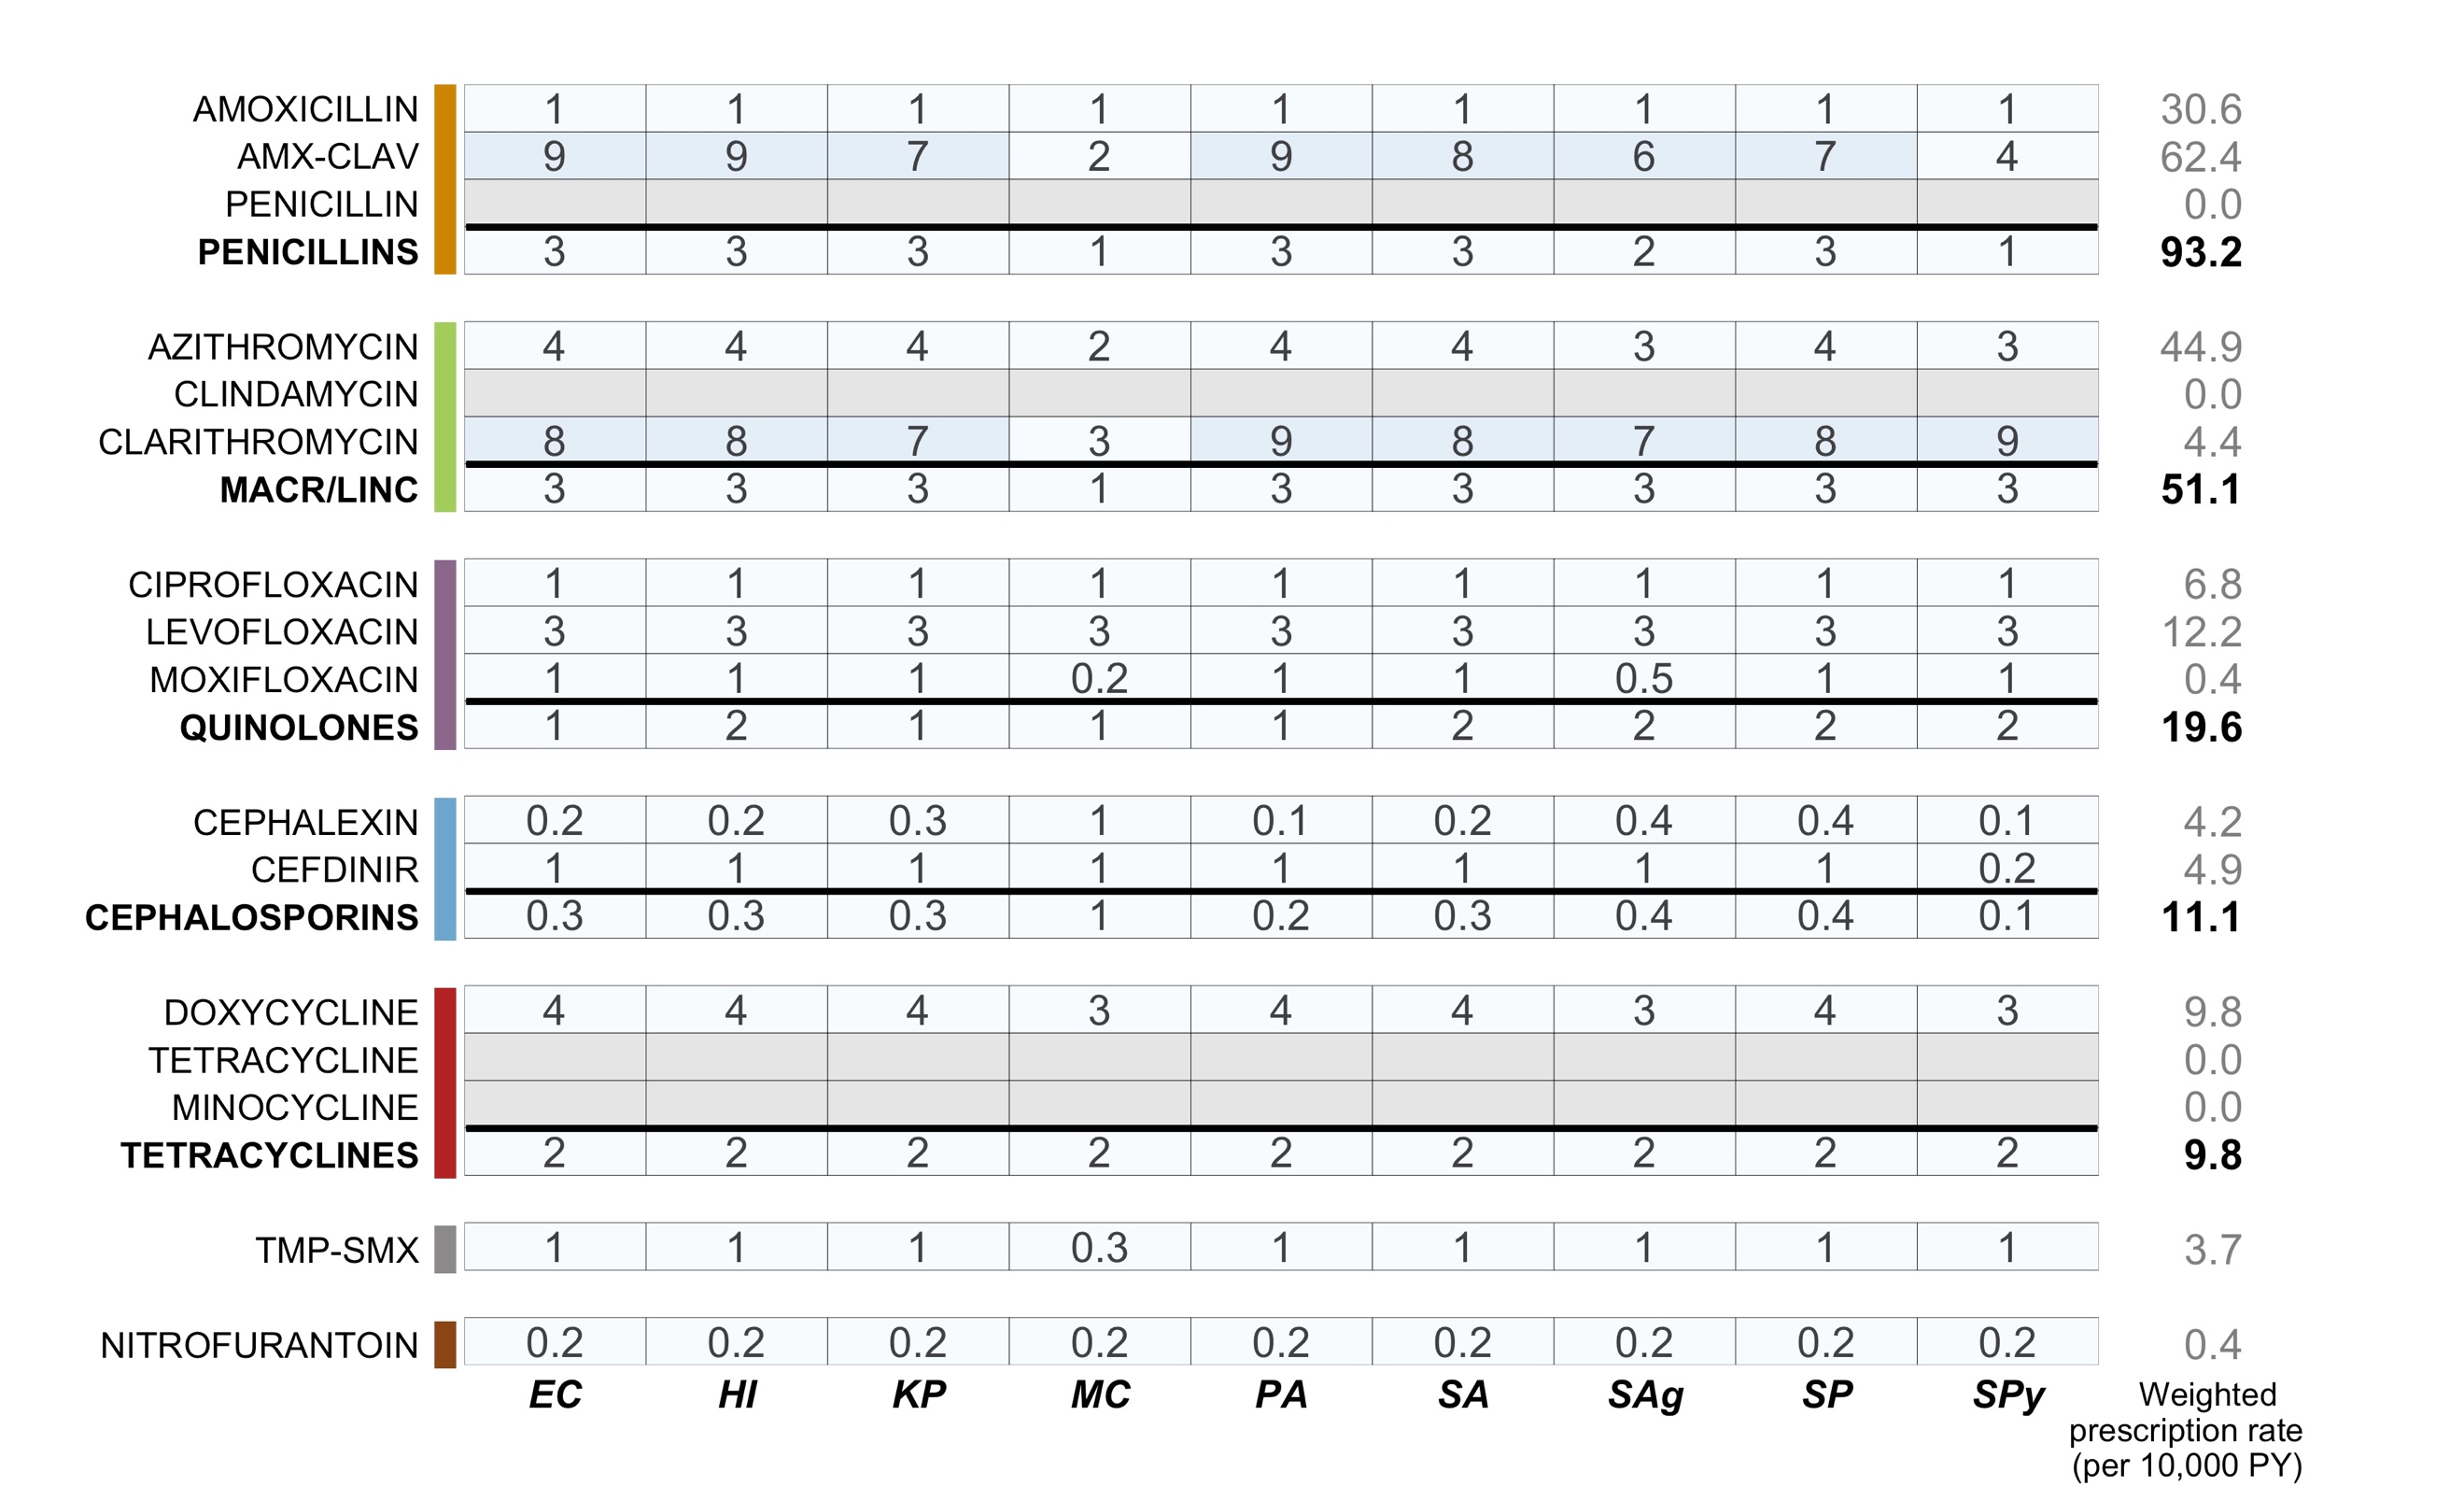


**B. Use estimates of bacterial etiology to approximate necessary antibiotic use for acute sinusitis.** The following upper bound estimates for the proportion of acute sinusitis cases with bacterial etiology were used: 2% for adults and 13% for children (applied to 0-19 year old age group) (Sande & Gwaltney, 2004; Snow, Mottur-Pilson, & Hickner, 2001; Wald, Guerra, & Byers, 1991).

**
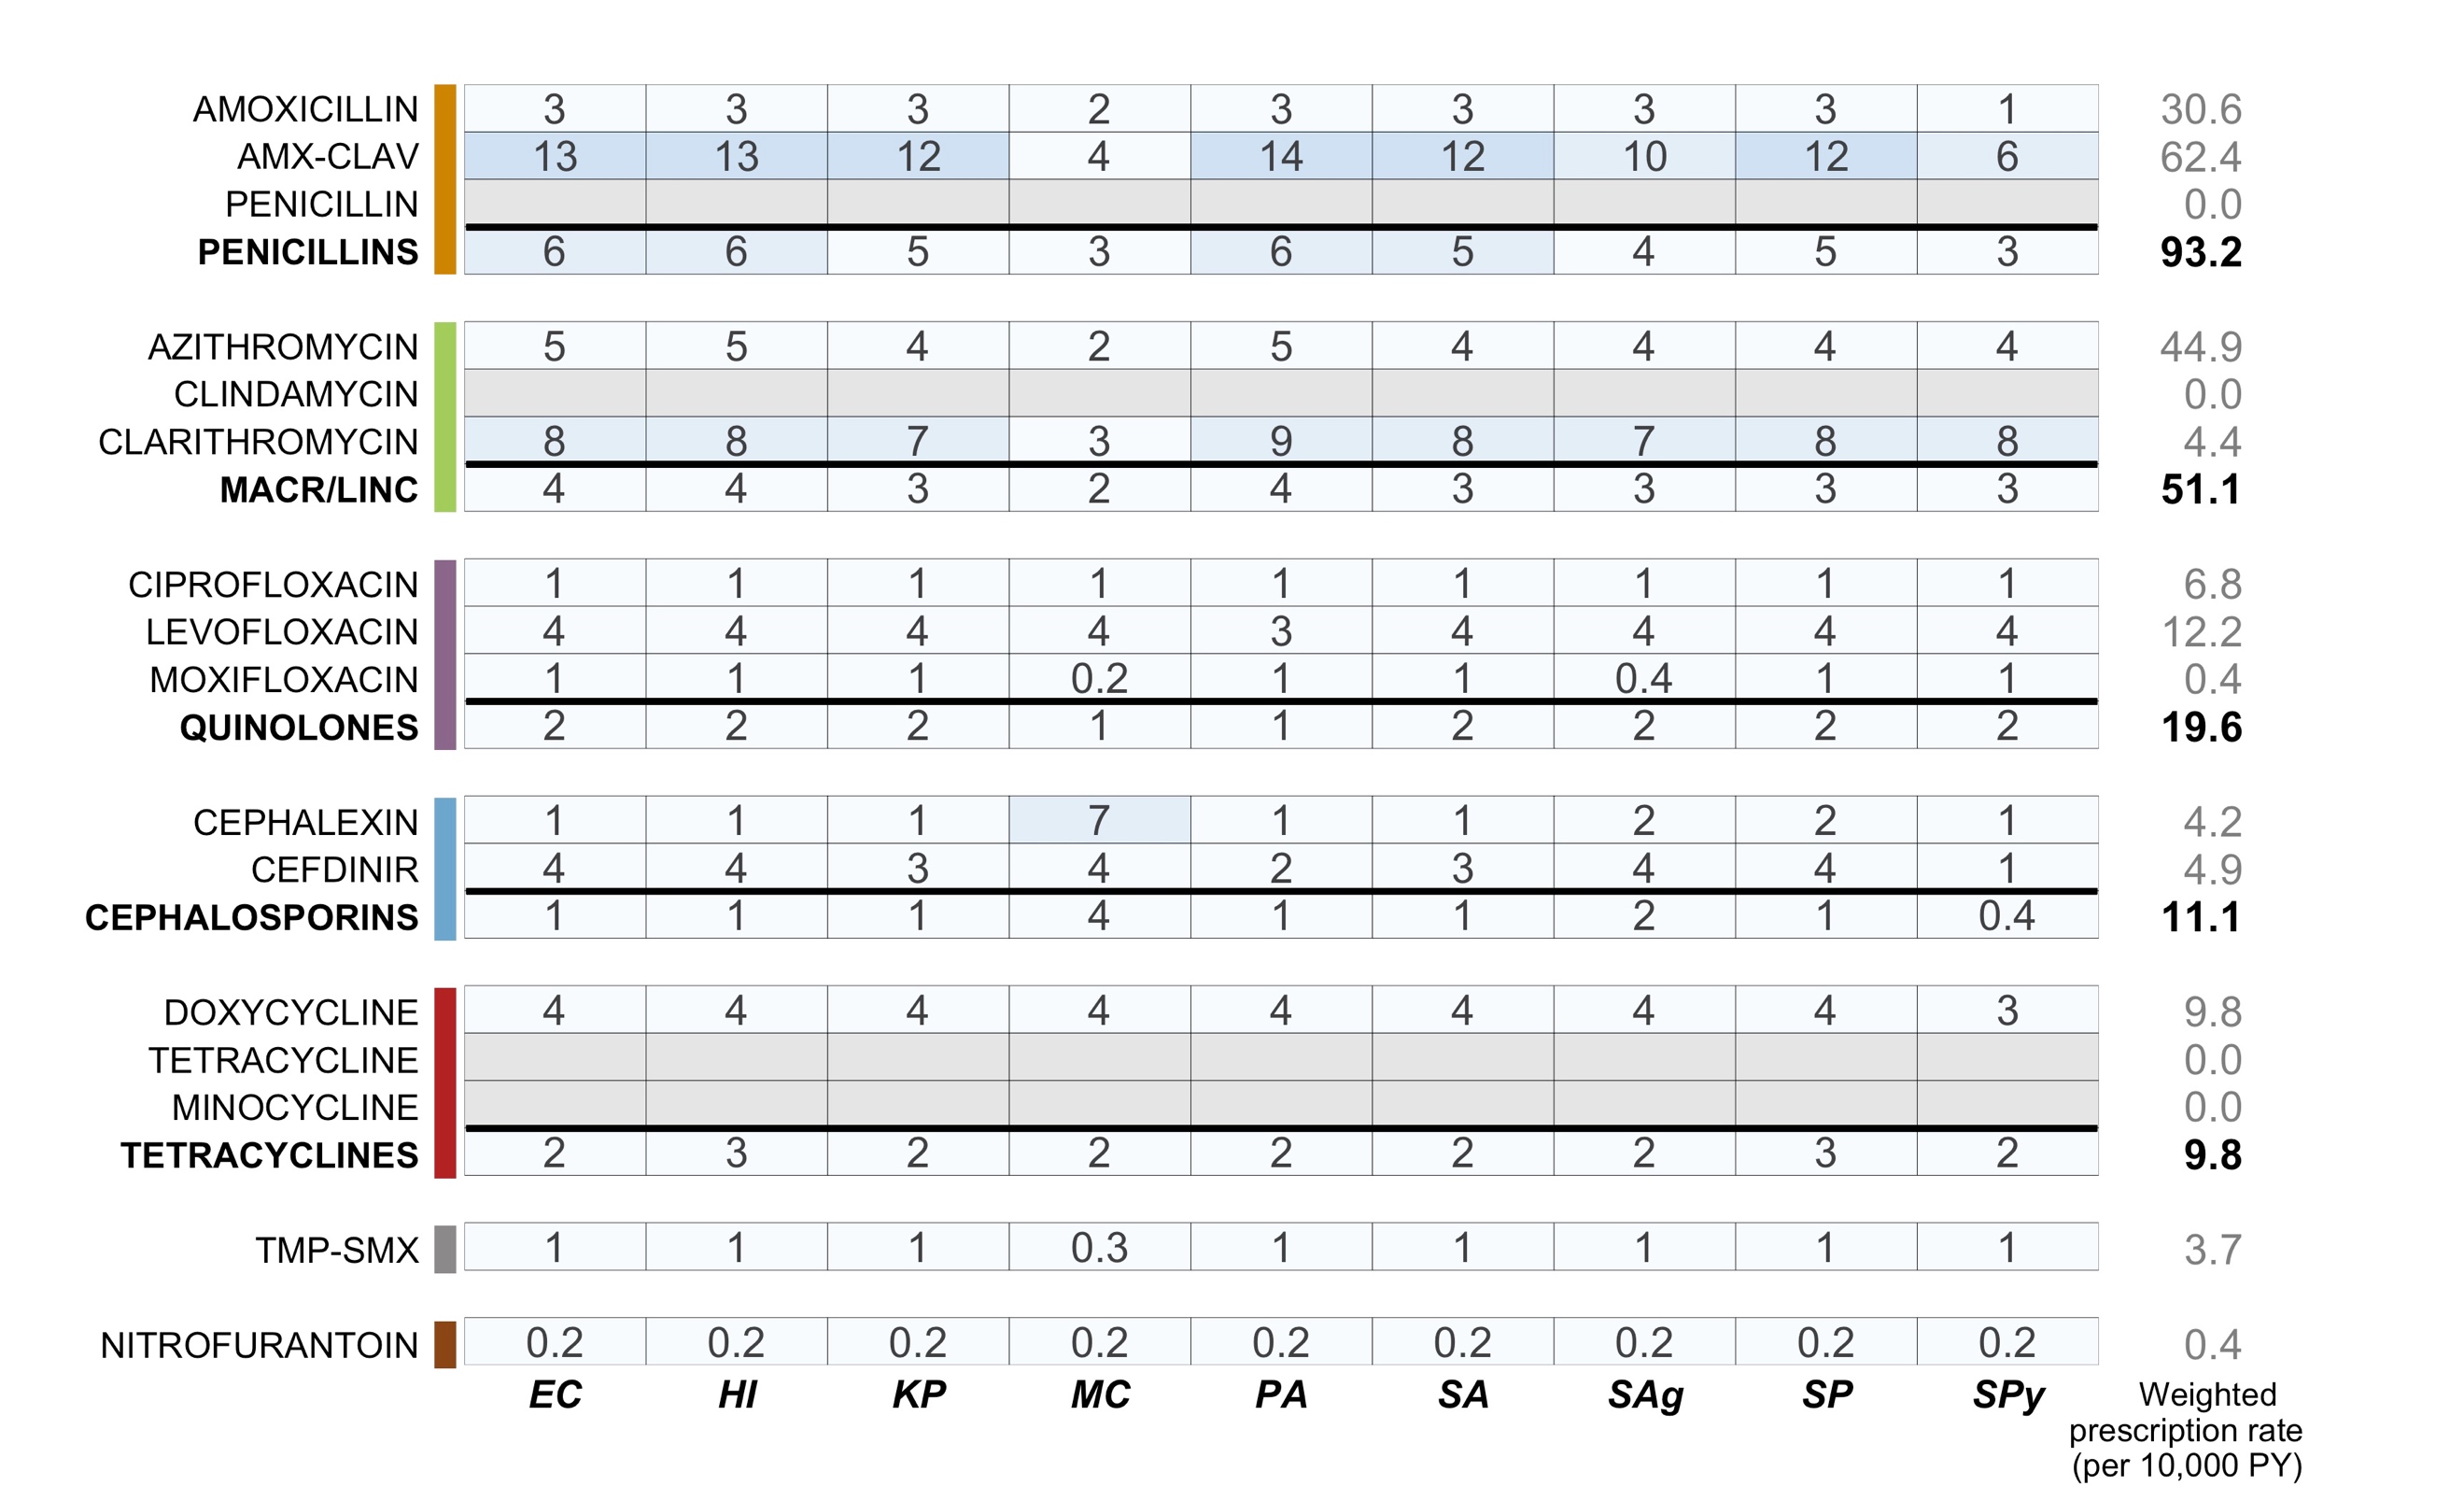
**

**C. Use estimates of bacterial etiology among those presenting to primary care clinics to approximate necessary antibiotic use.** Patients visiting the clinic are likely to have more persistent, severe, or worsening symptoms, which may be indications of bacterial etiology. Studies have estimated that approximately 38% of adults and 17% of children (upper bounds) visiting primary care for symptoms of acute upper respiratory tract infection have bacterial rhinosinusitis (Aitken & Taylor, 1998; Benninger, Holzer, & Lau, 2000; Williams, Simel, Roberts, & Samsa, 1992).

**
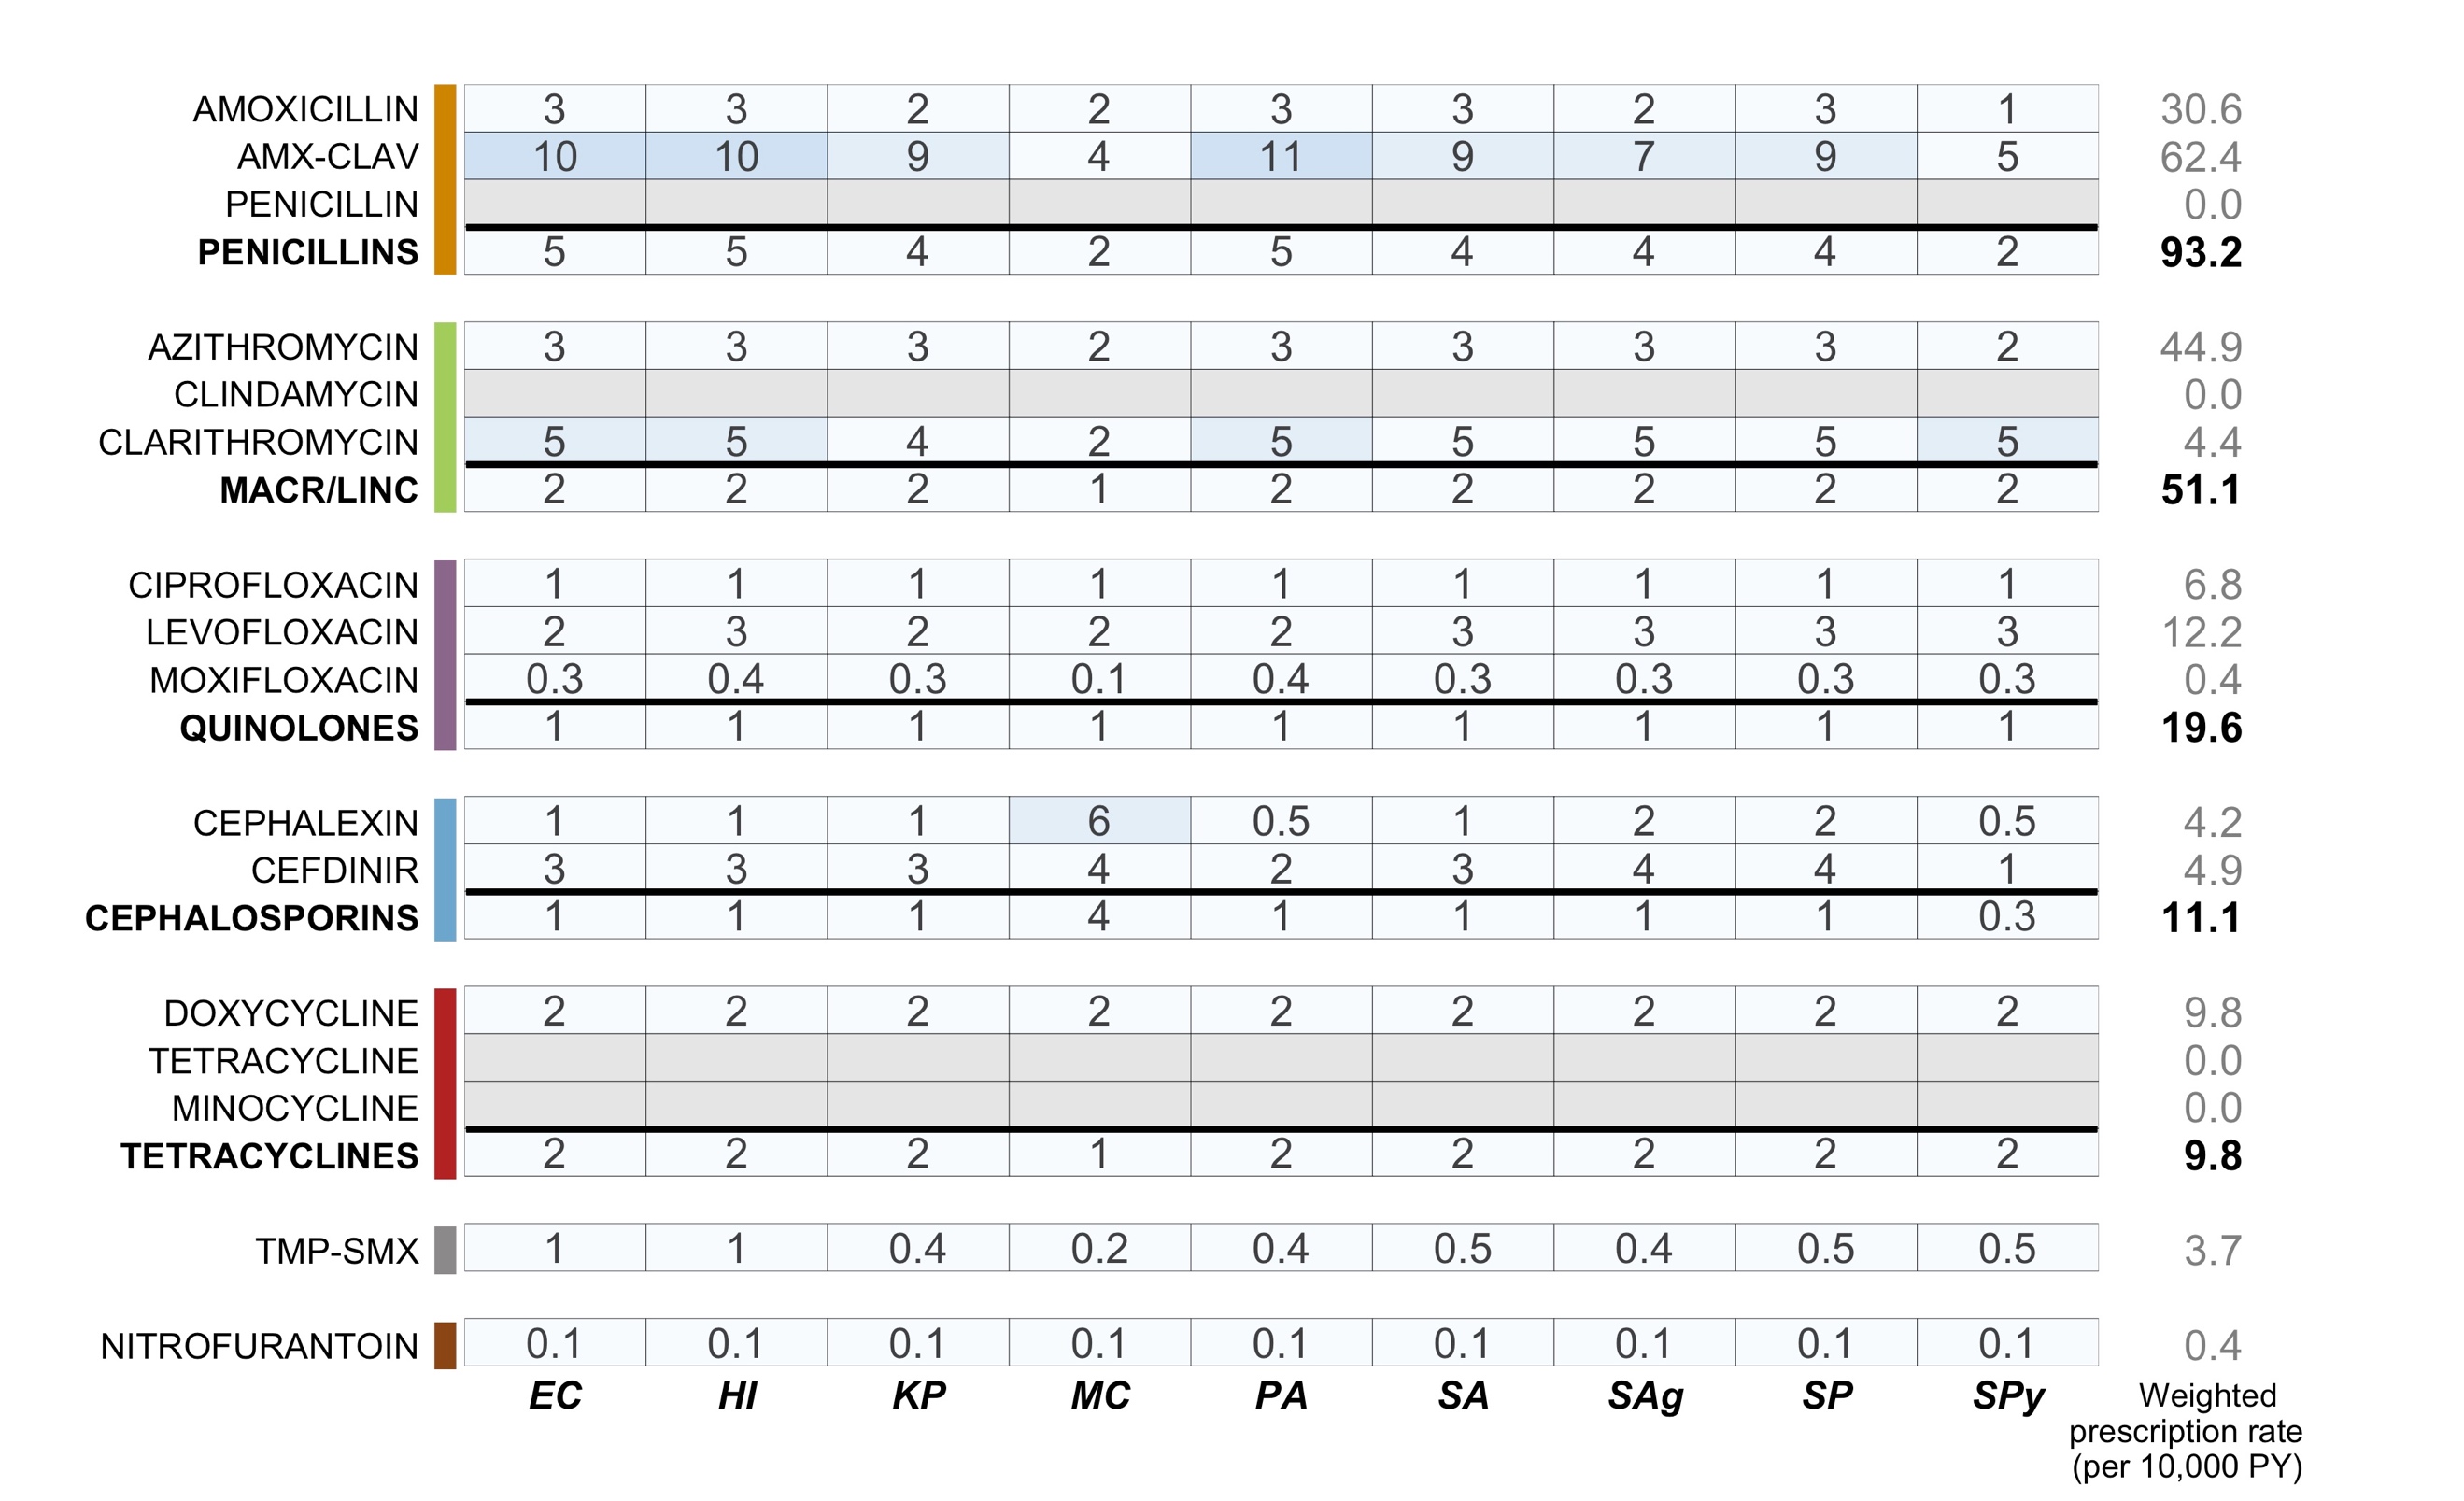
**


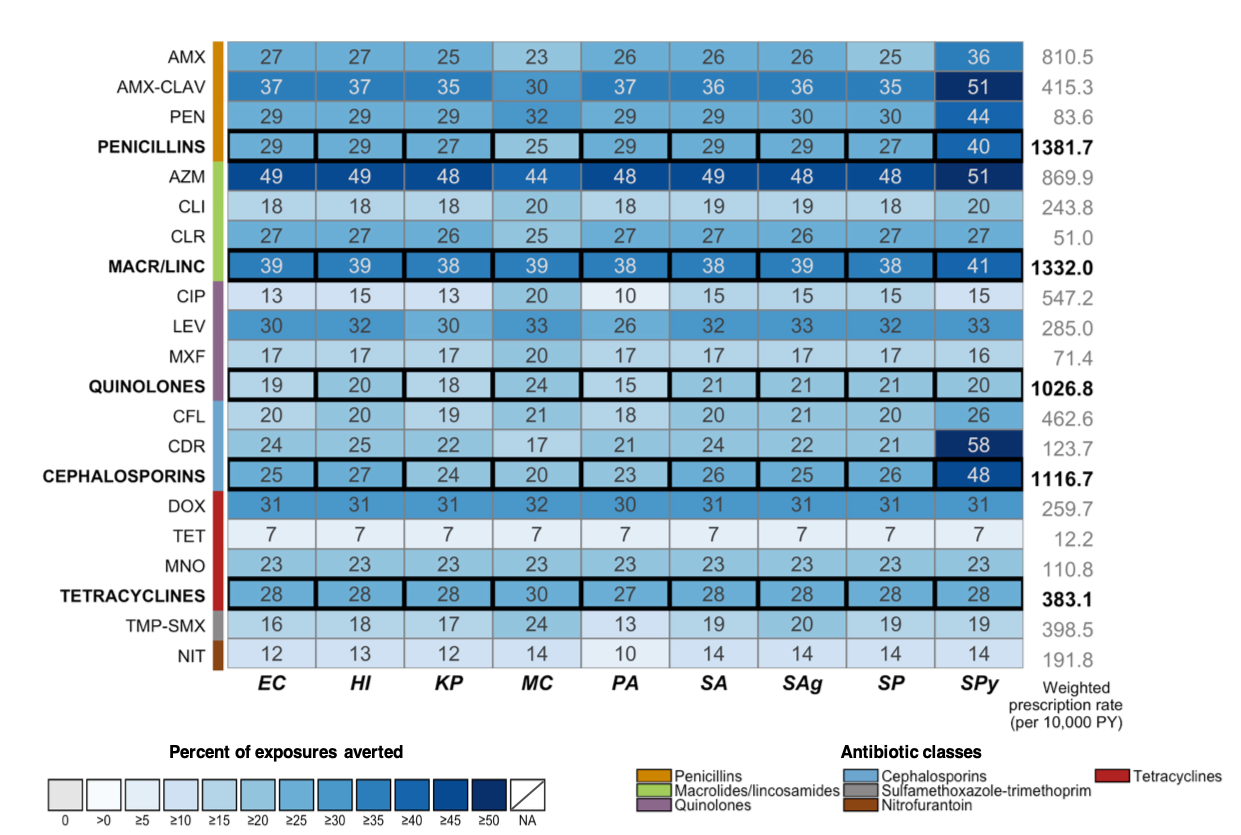


**Abbreviations:** *Antibiotics (y-axis):* AMX-CLAV=amoxicillin-clavulanate, MACR/LINC=macrolides/ lincosamides, TMP-SMX=sulfamethoxazole-trimethoprim; *Organisms (x-axis):* EC=*E. coli*, HI=*H. influenzae*, KP=*K. pneumoniae*, MC=*M. catarrhalis*, PA=*P. aeruginosa*, SA=*S. aureus*, SAg=*S. agalactiae*, SP=*S. pneumoniae*, SPy=*S. pyogenes*; PY=person-years

**References**

Aitken, M., & Taylor, J. A. (1998). Prevalence of Clinical Sinusitis in Young Children Followed Up by Primary Care Pediatricians. *Archives of Pediatrics & Adolescent Medicine*, *152*(3), 244–248. https://doi.org/10.1001/archpedi.152.3.244

Benninger, M. S., Holzer, S. E. S., & Lau, J. (2000). Diagnosis and treatment of uncomplicated acute bacterial rhinosinusitis: Summary of the Agency for Health Care Policy and Research evidence-based report. *Otolaryngology–Head and Neck Surgery*, *122*(1), 1–7. https://doi.org/10.1016/S0194-5998(00)70135-5

Fleming-Dutra, K. E., Hersh, A. L., Shapiro, D. J., Bartoces, M., Enns, E. A., File, T. M., … Hicks, L. A. (2016). Prevalence of Inappropriate Antibiotic Prescriptions Among US Ambulatory Care Visits, 2010-2011. *JAMA*, *315*(17), 1864–1873. https://doi.org/10.1001/jama.2016.4151

Sande, M. A., & Gwaltney, J. M. (2004). Acute Community-Acquired Bacterial Sinusitis: Continuing Challenges and Current Management. *Clinical Infectious Diseases*, *39*, S151–S158. https://doi.org/10.1086/421353

Snow, V., Mottur-Pilson, C., & Hickner, J. M. (2001). Principles of Appropriate Antibiotic Use for Acute Sinusitis in Adults. *Annals of Internal Medicine*, *134*(6), 495. https://doi.org/10.7326/0003-4819-134-6-200103200-00016

Wald, E. R., Guerra, N., & Byers, C. (1991). Upper Respiratory Tract Infections in Young Children: Duration of and Frequency of Complications. *Pediatrics*, *87*(2), 129–133.

Williams, J. W., Simel, D. L., Roberts, L., & Samsa, G. P. (1992). Clinical Evaluation for Sinusitis. *Annals of Internal Medicine*, *117*(9), 705–710. https://doi.org/10.7326/0003-4819-117-9-705
